# Supplementary material
Source: PubMed Central journal article supplement (PMC2689684)
Supplement: pbio.0060083.sg002.pdf [file pbio.0060083.sg002.pdf]

A

strain-condition interaction

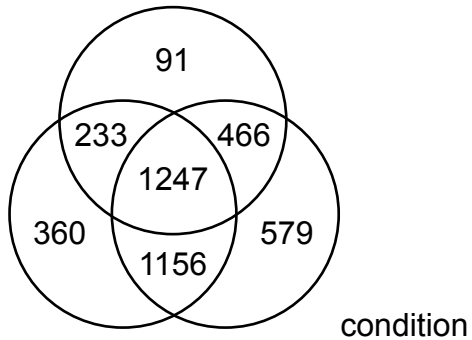

strain

condition

B

gene-environment interaction

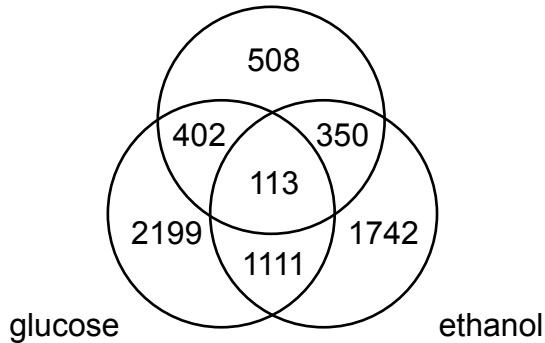

glucose

ethanol
