# Supplementary material
Source: PubMed Central journal article supplement (PMC2689684)

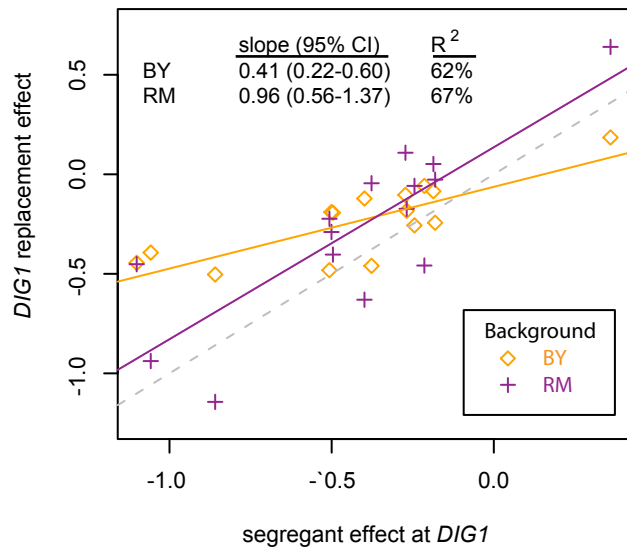

Supplement: pbio.0060083.sg003.pdf [file pbio.0060083.sg003.pdf]

A

glucose

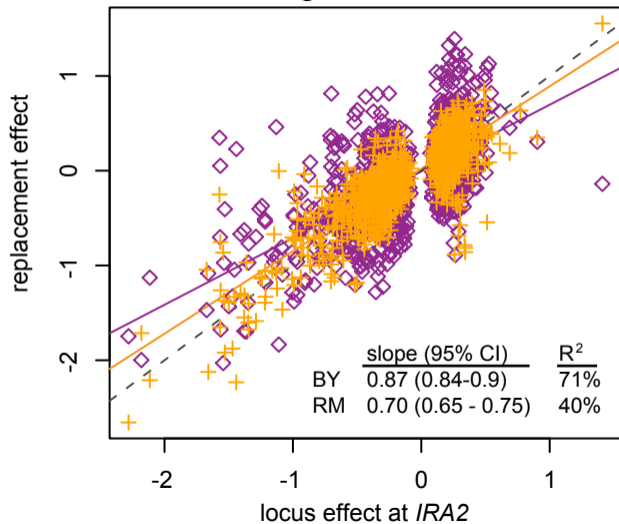

B

ethanol

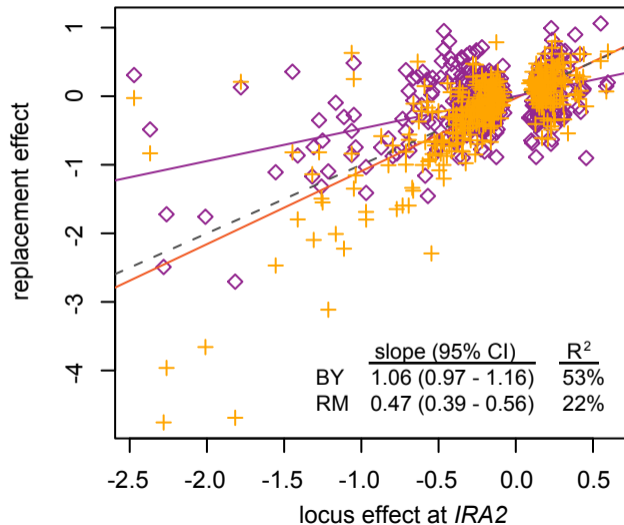

Supplement: pbio.0060083.sg004.pdf [file pbio.0060083.sg004.pdf]

A

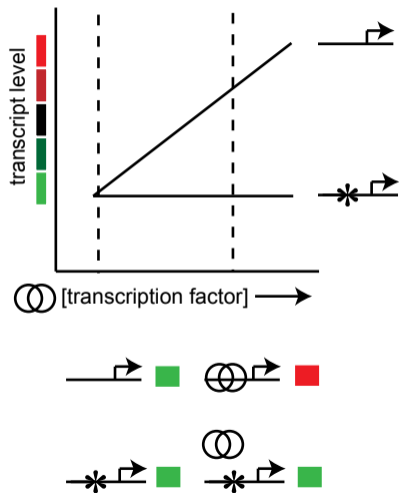

B

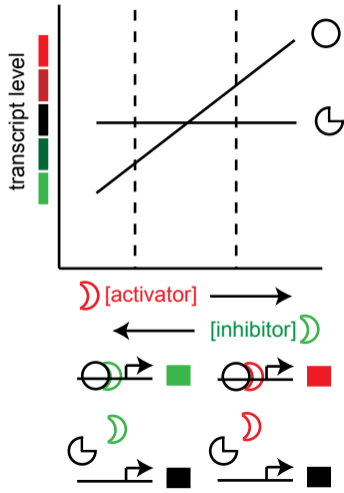

C

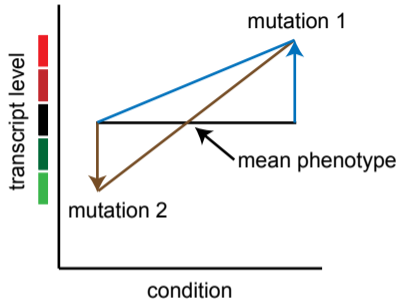

Supplement: pbio.0060083.sg005.pdf [file pbio.0060083.sg005.pdf]

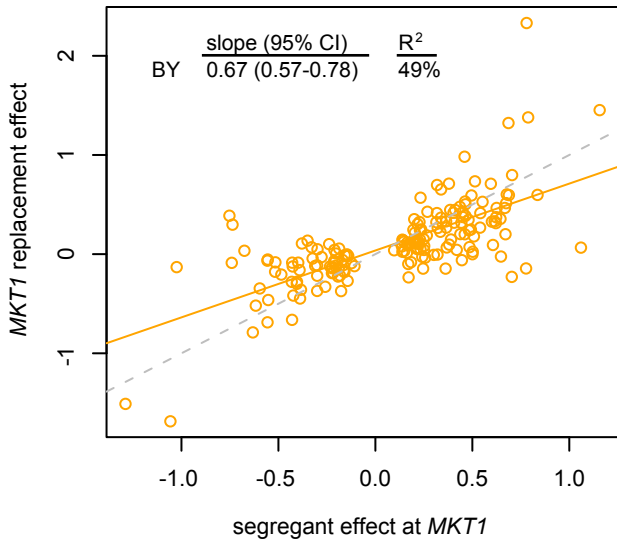

Supplement: pbio.0060083.sg006.pdf [file pbio.0060083.sg006.pdf]
